# Supplementary material for: Designing dithienonaphthalene based acceptor materials with promising photovoltaic parameters for organic solar cells
Source: Royal Society of Chemistry journal article supplement (doi:10.1039/c9ra06345e), 2019-01-01
Supplement: c9ra06345e1.pdf [file c9ra06345e1.pdf]

## Supporting information

### Designing Dithienonaphthalene Based Acceptor Materials with Promising Photovoltaic Parameters for Organic Solar Cells

Muhammad Ans,<sup>\*a</sup> Javed Iqbal,<sup>\*a,b</sup> Ijaz Ahmad Bhatti,<sup>a</sup> Khurshid Ayub,<sup>\*c</sup>

#### Cartesian Coordinates

##### Reference Compound R

| Symbol | X          | Y          | Z          |
|--------|------------|------------|------------|
| C      | 0.8179470  | 1.6951040  | 0.0010690  |
| C      | 0.6606810  | 0.2851200  | -0.0001720 |
| C      | -0.6606860 | -0.2851790 | -0.0005770 |
| C      | -1.7625120 | 0.6202810  | 0.0003000  |
| C      | -1.5695060 | 2.0094820  | 0.0015220  |
| C      | -0.2731690 | 2.5446890  | 0.0019110  |
| C      | 1.7625070  | -0.6203390 | -0.0010520 |
| C      | 1.5695010  | -2.0095410 | -0.0022470 |
| C      | 0.2731640  | -2.5447470 | -0.0025970 |
| C      | -0.8179520 | -1.6951630 | -0.0017830 |
| C      | -3.1942140 | 0.3989680  | 0.0002420  |
| C      | -3.8795580 | 1.6139180  | 0.0013770  |
| C      | -2.8972800 | 2.7717180  | 0.0022910  |
| C      | -5.6836400 | 0.1415010  | 0.0003330  |
| C      | -5.2693640 | 1.4810290  | 0.0014490  |
| C      | 3.1942110  | -0.3990260 | -0.0009520 |
| C      | 3.8795530  | -1.6139750 | -0.0020720 |
| C      | 2.8972780  | -2.7717740 | -0.0030430 |
| C      | 5.6836390  | -0.1415630 | -0.0009120 |
| C      | 5.2693630  | -1.4810870 | -0.0020740 |

|   |             |            |            |
|---|-------------|------------|------------|
| C | -6.9468970  | -0.5078990 | 0.0001530  |
| C | 6.9468890   | 0.5078610  | -0.0005300 |
| C | -8.2475870  | -0.0413680 | 0.0005090  |
| C | 8.2475930   | 0.0413650  | -0.0005820 |
| C | -9.4523930  | -0.8870550 | 0.0002550  |
| C | -10.6321110 | 0.0175780  | -0.0001290 |
| C | -10.1798700 | 1.3480590  | 0.0003160  |
| C | -8.7001830  | 1.3772490  | 0.0008050  |
| C | 9.4523760   | 0.8870840  | -0.0002410 |
| C | 10.6321190  | -0.0175130 | 0.0023480  |
| C | 10.1799210  | -1.3480060 | 0.0024150  |
| C | 8.7002370   | -1.3772450 | 0.0003140  |
| C | -12.0106100 | -0.2298980 | -0.0007980 |
| C | -12.8852300 | 0.8607950  | -0.0009540 |
| C | -12.4166170 | 2.1802910  | -0.0004470 |
| C | -11.0444580 | 2.4341850  | 0.0001910  |
| C | 12.0106080  | 0.2300130  | 0.0044490  |
| C | 12.8852630  | -0.8606500 | 0.0064730  |
| C | 12.4166940  | -2.1801610 | 0.0063900  |
| C | 11.0445450  | -2.4341020 | 0.0043410  |
| O | 8.0257000   | -2.4014930 | -0.0003000 |
| C | 9.5335220   | 2.2689550  | -0.0025850 |
| O | -8.0256010  | 2.4014700  | 0.0012960  |
| C | -9.5335730  | -2.2689240 | 0.0005660  |
| C | -10.7715670 | -2.9841830 | 0.0002300  |
| N | -11.7527360 | -3.6124270 | -0.0000350 |
| C | -8.4090700  | -3.1514380 | 0.0013490  |
| N | -7.5235240  | -3.9093310 | 0.0019520  |

|   |             |            |            |
|---|-------------|------------|------------|
| C | 8.4089910   | 3.1514270  | -0.0062800 |
| N | 7.5234980   | 3.9093740  | -0.0093660 |
| C | 10.7714950  | 2.9842480  | -0.0018780 |
| N | 11.7526030  | 3.6125860  | -0.0013580 |
| C | -3.0470490  | 3.6448040  | -1.2646950 |
| C | -3.0468610  | 3.6426080  | 1.2708160  |
| C | 3.0468500   | -3.6426140 | -1.2715960 |
| C | 3.0470540   | -3.6449140 | 1.2639140  |
| H | 1.8161670   | 2.1196890  | 0.0013660  |
| H | -0.1207330  | 3.6198880  | 0.0028620  |
| H | 0.1207280   | -3.6199470 | -0.0034960 |
| H | -1.8161710  | -2.1197480 | -0.0020750 |
| H | -5.9962500  | 2.2816430  | 0.0022180  |
| H | 5.9962360   | -2.2817120 | -0.0028390 |
| H | -6.8498070  | -1.5875940 | -0.0004450 |
| H | 6.8497710   | 1.5875510  | 0.0000450  |
| H | -12.4152520 | -1.2320950 | -0.0012160 |
| H | -13.9547180 | 0.6738930  | -0.0014910 |
| H | -13.1244510 | 3.0034790  | -0.0005600 |
| H | -10.6432290 | 3.4425100  | 0.0005710  |
| H | 12.4152140  | 1.2322230  | 0.0046190  |
| H | 13.9547440  | -0.6737130 | 0.0081470  |
| H | 13.1245530  | -3.0033260 | 0.0079560  |
| H | 10.6433540  | -3.4424420 | 0.0042410  |
| H | -4.0304730  | 4.1245190  | -1.2810210 |
| H | -2.9422280  | 3.0452710  | -2.1729410 |
| H | -2.2872170  | 4.4324970  | -1.2828260 |
| H | -4.0302870  | 4.1222830  | 1.2881090  |

|   |            |            |            |
|---|------------|------------|------------|
| H | -2.2870370 | 4.4302790  | 1.2902010  |
| H | -2.9419040 | 3.0414970  | 2.1780010  |
| H | 4.0302750  | -4.1222910 | -1.2889260 |
| H | 2.9418810  | -3.0414740 | -2.1787620 |
| H | 2.2870240  | -4.4302840 | -1.2910030 |
| H | 4.0304780  | -4.1246270 | 1.2802050  |
| H | 2.2872220  | -4.4326080 | 1.2820200  |
| H | 2.9422430  | -3.0454110 | 2.1721800  |
| S | 4.2641370  | 0.9443710  | 0.0001130  |
| S | -4.2641400 | -0.9444320 | -0.0007560 |

**Designed molecule H1.**

| Symbol | X          | Y          | Z          |
|--------|------------|------------|------------|
| C      | 0.7668300  | 1.7187520  | 0.0004210  |
| C      | 0.6518020  | 0.3047030  | -0.0003990 |
| C      | -0.6518040 | -0.3047290 | -0.0006230 |
| C      | -1.7801100 | 0.5675920  | 0.0000100  |
| C      | -1.6287810 | 1.9621080  | 0.0008190  |
| C      | -0.3489830 | 2.5356520  | 0.0010260  |
| C      | 1.7801090  | -0.5676180 | -0.0010290 |
| C      | 1.6287800  | -1.9621340 | -0.0018350 |
| C      | 0.3489820  | -2.5356780 | -0.0020290 |
| C      | -0.7668310 | -1.7187780 | -0.0014350 |
| C      | -3.2042440 | 0.3037170  | 0.0000300  |
| C      | -3.9257430 | 1.4982020  | 0.0008190  |
| C      | -2.9784360 | 2.6847470  | 0.0013890  |
| C      | -5.6844300 | -0.0282890 | 0.0001890  |
| C      | -5.3103420 | 1.3237030  | 0.0009210  |

|   |             |            |            |
|---|-------------|------------|------------|
| C | 3.2042430   | -0.3037420 | -0.0010020 |
| C | 3.9257410   | -1.4982260 | -0.0017790 |
| C | 2.9784370   | -2.6847720 | -0.0024170 |
| C | 5.6844300   | 0.0282600  | -0.0010230 |
| C | 5.3103420   | -1.3237280 | -0.0017960 |
| C | -6.9266930  | -0.7147950 | 0.0001020  |
| C | 6.9266900   | 0.7147800  | -0.0007930 |
| C | -8.2415280  | -0.2874450 | 0.0004210  |
| C | 8.2415300   | 0.2874460  | -0.0008700 |
| C | -9.4190780  | -1.1697800 | 0.0002540  |
| C | -10.6247450 | -0.3019960 | 0.0003480  |
| C | -10.2132930 | 1.0403490  | 0.0007120  |
| C | -8.7351230  | 1.1155710  | 0.0008140  |
| C | 9.4190740   | 1.1697890  | -0.0006780 |
| C | 10.6247480  | 0.3020140  | 0.0009360  |
| C | 10.2133050  | -1.0403340 | 0.0010120  |
| C | 8.7351390   | -1.1155700 | -0.0002960 |
| C | -11.9947390 | -0.5970820 | 0.0001400  |
| C | -12.8869940 | 0.4672560  | 0.0003030  |
| C | -12.4565050 | 1.8025030  | 0.0006830  |
| C | -11.1042130 | 2.1064620  | 0.0008870  |
| C | 11.9947400  | 0.5971100  | 0.0021950  |
| C | 12.8870020  | -0.4672210 | 0.0034600  |
| C | 12.4565230  | -1.8024710 | 0.0034580  |
| C | 11.1042340  | -2.1064400 | 0.0022240  |
| O | 8.0966950   | -2.1621920 | -0.0006210 |
| C | 9.4613590   | 2.5530230  | -0.0021580 |
| O | -8.0966640  | 2.1621850  | 0.0011380  |

|   |             |            |            |
|---|-------------|------------|------------|
| C | -9.4613750  | -2.5530120 | 0.0001590  |
| C | -10.6813800 | -3.2979220 | 0.0000310  |
| N | -11.6527910 | -3.9410480 | -0.0000280 |
| C | -8.3121790  | -3.4027730 | 0.0002670  |
| N | -7.4044750  | -4.1337980 | 0.0003260  |
| C | 8.3121520   | 3.4027660  | -0.0045220 |
| N | 7.4044740   | 4.1338210  | -0.0064790 |
| C | 10.6813530  | 3.2979500  | -0.0016550 |
| N | 11.6527260  | 3.9411330  | -0.0012580 |
| C | -3.1541060  | 3.5525730  | -1.2659600 |
| C | -3.1538260  | 3.5511090  | 1.2697830  |
| C | 3.1538350   | -3.5510840 | -1.2708370 |
| C | 3.1540970   | -3.5526480 | 1.2649060  |
| H | 1.7518410   | 2.1731320  | 0.0005740  |
| H | -0.2284970  | 3.6148510  | 0.0016510  |
| H | 0.2284960   | -3.6148770 | -0.0026380 |
| H | -1.7518420  | -2.1731590 | -0.0016030 |
| H | -6.0598970  | 2.1030400  | 0.0014560  |
| H | 6.0598890   | -2.1030740 | -0.0023270 |
| H | -6.7981770  | -1.7912140 | -0.0003350 |
| H | 6.7981590   | 1.7911960  | -0.0003960 |
| H | -12.3971640 | -1.6004500 | -0.0001540 |
| H | -10.7579330 | 3.1339020  | 0.0011750  |
| H | 12.3971570  | 1.6004800  | 0.0022830  |
| H | 10.7579630  | -3.1338830 | 0.0022140  |
| H | -4.1511470  | 4.0032370  | -1.2821050 |
| H | -3.0318460  | 2.9562870  | -2.1741510 |
| H | -2.4179300  | 4.3623380  | -1.2843390 |

|   |             |            |            |
|---|-------------|------------|------------|
| H | -4.1508680  | 4.0017420  | 1.2866620  |
| H | -2.4176540  | 4.3608600  | 1.2889310  |
| H | -3.0313590  | 2.9537690  | 2.1772540  |
| H | 4.1508750   | -4.0017230 | -1.2877340 |
| H | 3.0313750   | -2.9537150 | -2.1782890 |
| H | 2.4176610   | -4.3608330 | -1.2900230 |
| H | 4.1511420   | -4.0033010 | 1.2810370  |
| H | 2.4179270   | -4.3624200 | 1.2832420  |
| H | 3.0318220   | -2.9563930 | 2.1731150  |
| S | 4.2328380   | 1.0710760  | -0.0002980 |
| S | -4.2328390  | -1.0711030 | -0.0006030 |
| F | 14.2041880  | -0.2311220 | 0.0047410  |
| F | 13.3799030  | -2.7704970 | 0.0046980  |
| F | -13.3798800 | 2.7705350  | 0.0008350  |
| F | -14.2041820 | 0.2311670  | 0.0000970  |

### Designed molecule H2

| Symbol | X          | Y          | Z          |
|--------|------------|------------|------------|
| C      | 0.7376890  | 1.7310980  | 0.0003720  |
| C      | 0.6463970  | 0.3153790  | -0.0005140 |
| C      | -0.6464000 | -0.3154070 | -0.0007460 |
| C      | -1.7890370 | 0.5385430  | -0.0000670 |
| C      | -1.6611450 | 1.9360910  | 0.0008050  |
| C      | -0.3910210 | 2.5302670  | 0.0010300  |
| C      | 1.7890350  | -0.5385700 | -0.0011980 |
| C      | 1.6611430  | -1.9361190 | -0.0020540 |
| C      | 0.3910190  | -2.5302950 | -0.0022430 |
| C      | -0.7376910 | -1.7311260 | -0.0016060 |

|   |             |            |            |
|---|-------------|------------|------------|
| C | -3.2072520  | 0.2512670  | -0.0000620 |
| C | -3.9493030  | 1.4358690  | 0.0008030  |
| C | -3.0215840  | 2.6375790  | 0.0014230  |
| C | -5.6805820  | -0.1223770 | 0.0001240  |
| C | -5.3283430  | 1.2384480  | 0.0009200  |
| C | 3.2072510   | -0.2512950 | -0.0011960 |
| C | 3.9493000   | -1.4358960 | -0.0020270 |
| C | 3.0215830   | -2.6376050 | -0.0026900 |
| C | 5.6805840   | 0.1223440  | -0.0012190 |
| C | 5.3283430   | -1.2384760 | -0.0020440 |
| C | -6.9069960  | -0.8278200 | 0.0000370  |
| C | 6.9069920   | 0.8278020  | -0.0009700 |
| C | -8.2332120  | -0.4215170 | 0.0004470  |
| C | 8.2332130   | 0.4215140  | -0.0010690 |
| C | -9.3929060  | -1.3231410 | 0.0002950  |
| C | -10.6168170 | -0.4735790 | 0.0004410  |
| C | -10.2254700 | 0.8741600  | 0.0008600  |
| C | -8.7432380  | 0.9702640  | 0.0009380  |
| C | 9.3929010   | 1.3231460  | -0.0009330 |
| C | 10.6168180  | 0.4735920  | 0.0005730  |
| C | 10.2254820  | -0.8741500 | 0.0006520  |
| C | 8.7432520   | -0.9702660 | -0.0005080 |
| C | -11.9790210 | -0.7841230 | 0.0002300  |
| C | -12.9147690 | 0.2639060  | 0.0004650  |
| C | -12.4975670 | 1.6213890  | 0.0009230  |
| C | -11.1289500 | 1.9223970  | 0.0011140  |
| C | 11.9790190  | 0.7841490  | 0.0017680  |
| C | 12.9147760  | -0.2638700 | 0.0029740  |



|   |             |            |            |
|---|-------------|------------|------------|
| C | 12.4975860  | -1.6213570 | 0.0029530  |
| C | 11.1289730  | -1.9223770 | 0.0017680  |
| O | 8.1269700   | -2.0294590 | -0.0008520 |
| C | 9.4168800   | 2.7062400  | -0.0024040 |
| O | -8.1269420  | 2.0294500  | 0.0013130  |
| C | -9.4168960  | -2.7062350 | 0.0001680  |
| C | -10.6242770 | -3.4712600 | 0.0000140  |
| N | -11.5837410 | -4.1317530 | -0.0000810 |
| C | -8.2529430  | -3.5359580 | 0.0002350  |
| N | -7.3299700  | -4.2472820 | 0.0002790  |
| C | 8.2529130   | 3.5359400  | -0.0046540 |
| N | 7.3299730   | 4.2473050  | -0.0065190 |
| C | 10.6242490  | 3.4712840  | -0.0020130 |
| N | 11.5836750  | 4.1318310  | -0.0017080 |
| C | -3.2109980  | 3.5024990  | -1.2662110 |
| C | -3.2106780  | 3.5009270  | 1.2701810  |
| C | 3.2106600   | -3.5009050 | -1.2714790 |
| C | 3.2110130   | -3.5025760 | 1.2649140  |
| H | 1.7147660   | 2.2022530  | 0.0005440  |
| H | -0.2877490  | 3.6111100  | 0.0017130  |
| H | 0.2877470   | -3.6111380 | -0.0028770 |
| H | -1.7147680  | -2.2022800 | -0.0017660 |
| H | -6.0901250  | 2.0057560  | 0.0015070  |
| H | 6.0901130   | -2.0057950 | -0.0025960 |
| H | -6.7617540  | -1.9020430 | -0.0004920 |
| H | 6.7617360   | 1.9020210  | -0.0005300 |
| H | -12.3468540 | -1.8003330 | -0.0001220 |
| H | -10.7795070 | 2.9488560  | 0.0014520  |

|   |             |            |            |
|---|-------------|------------|------------|
| H | 12.3468420  | 1.8003620  | 0.0018390  |
| H | 10.7795410  | -2.9488410 | 0.0017430  |
| H | -4.2146020  | 3.9380780  | -1.2815020 |
| H | -3.0799230  | 2.9088060  | -2.1748390 |
| H | -2.4875820  | 4.3234910  | -1.2841470 |
| H | -4.2142760  | 3.9364900  | 1.2862560  |
| H | -2.4872560  | 4.3218950  | 1.2889590  |
| H | -3.0793800  | 2.9061020  | 2.1780350  |
| H | 4.2142590   | -3.9364640 | -1.2875910 |
| H | 3.0793440   | -2.9060500 | -2.1793110 |
| H | 2.4872400   | -4.3218740 | -1.2902720 |
| H | 4.2146160   | -3.9381560 | 1.2801700  |
| H | 2.4875970   | -4.3235680 | 1.2828320  |
| H | 3.0799530   | -2.9089130 | 2.1735630  |
| S | 4.2101410   | 1.1406840  | -0.0004460 |
| S | -4.2101440  | -1.1407120 | -0.0007520 |
| C | 14.3113810  | 0.0585000  | 0.0042520  |
| N | 15.4402680  | 0.3363460  | 0.0052900  |
| C | 13.4569240  | -2.6846150 | 0.0041590  |
| N | 14.2109030  | -3.5697780 | 0.0051250  |
| C | -13.4568960 | 2.6846550  | 0.0011940  |
| N | -14.2108660 | 3.5698270  | 0.0014250  |
| C | -14.3113770 | -0.0584520 | 0.0002220  |
| N | -15.4402670 | -0.3362880 | 0.0000170  |

### Designed Molecule H3

| Symbol | X          | Y          | Z          |
|--------|------------|------------|------------|
| C      | -1.1164450 | -1.0849680 | -0.0004350 |

|   |            |            |            |
|---|------------|------------|------------|
| C | -0.8257050 | 0.3038660  | -0.0000970 |
| C | 0.5439430  | 0.7457090  | 0.0000200  |
| C | 1.5547910  | -0.2604660 | -0.0001600 |
| C | 1.2304780  | -1.6251710 | -0.0004870 |
| C | -0.1108580 | -2.0343610 | -0.0006390 |
| C | -1.8374390 | 1.3094830  | 0.0001170  |
| C | -1.5116230 | 2.6738920  | 0.0003510  |
| C | -0.1705170 | 3.0837470  | 0.0004090  |
| C | 0.8348770  | 2.1341670  | 0.0002650  |
| C | 3.0006580  | -0.1763600 | -0.0001060 |
| C | 3.5676230  | -1.4515230 | -0.0003970 |
| C | 2.4795550  | -2.5104020 | -0.0006430 |
| C | 5.5030780  | -0.1567010 | -0.0000610 |
| C | 4.9630950  | -1.4514530 | -0.0003820 |
| C | -3.2847530 | 1.2218790  | 0.0001080  |
| C | -3.8451360 | 2.4990360  | 0.0003090  |
| C | -2.7602200 | 3.5605040  | 0.0005270  |
| C | -5.7719360 | 1.1677320  | 0.0002690  |
| C | -5.2363920 | 2.4709470  | 0.0004020  |
| C | 2.5455520  | -3.3925210 | -1.2685220 |
| C | 2.5454700  | -3.3929720 | 1.2669420  |
| C | -2.8244690 | 4.4431670  | -1.2670080 |
| C | -2.8244850 | 4.4425460  | 1.2685140  |
| H | -2.1504910 | -1.4124810 | -0.0005740 |
| H | -0.3650390 | -3.0901420 | -0.0009250 |
| H | 0.0837040  | 4.1395420  | 0.0005550  |
| H | 1.8689170  | 2.4620330  | 0.0003190  |
| H | 5.6109410  | -2.3172920 | -0.0005590 |

|   |            |            |            |
|---|------------|------------|------------|
| H | -5.8842870 | 3.3412160  | 0.0005210  |
| H | 3.4786410  | -3.9639900 | -1.2852590 |
| H | 2.4985510  | -2.7848870 | -2.1762080 |
| H | 1.7138970  | -4.1039540 | -1.2873780 |
| H | 3.4785740  | -3.9644190 | 1.2835600  |
| H | 1.7138260  | -4.1044240 | 1.2854540  |
| H | 2.4983680  | -2.7856520 | 2.1748310  |
| H | -3.7549880 | 5.0191990  | -1.2835260 |
| H | -2.7803960 | 3.8357010  | -2.1749170 |
| H | -1.9908230 | 5.1521450  | -1.2866810 |
| H | -3.7550300 | 5.0185250  | 1.2853180  |
| H | -1.9908580 | 5.1515330  | 1.2884940  |
| H | -2.7803700 | 3.8346210  | 2.1761110  |
| S | -4.4635170 | -0.0380290 | 0.0000710  |
| S | 4.1931120  | 1.0593980  | 0.0002100  |
| C | 6.8219330  | 0.3670460  | -0.0000640 |
| C | 8.0743250  | -0.2196770 | -0.0001340 |
| C | 8.3936020  | -1.6843640 | 0.0004000  |
| C | 9.8677320  | -1.7716250 | 0.0008730  |
| C | 10.4277790 | -0.4560930 | 0.0005230  |
| C | 9.3404960  | 0.5341990  | -0.0002910 |
| C | 10.7915990 | -2.7735070 | 0.0015790  |
| C | 11.8007200 | -0.4655020 | 0.0009690  |
| O | 7.6190940  | -2.6335930 | 0.0004480  |
| C | 9.5605470  | 1.9012830  | -0.0012200 |
| C | 8.5400640  | 2.8983350  | -0.0024230 |
| N | 7.7285950  | 3.7352840  | -0.0034260 |
| C | 10.8884950 | 2.4264920  | -0.0011110 |

|   |             |            |            |
|---|-------------|------------|------------|
| N | 11.9742260  | 2.8495440  | -0.0009980 |
| H | 10.6367800  | -3.8430310 | 0.0019160  |
| H | 12.5002020  | 0.3567570  | 0.0008790  |
| S | 12.3924950  | -2.0990440 | 0.0019010  |
| C | -7.1755450  | 0.9687590  | 0.0002150  |
| C | -7.9942820  | -0.1421530 | 0.0001160  |
| C | -7.5336730  | -1.5593770 | -0.0001170 |
| C | -8.7591700  | -2.3835960 | -0.0003110 |
| C | -9.9048840  | -1.5247960 | -0.0002200 |
| C | -9.4636960  | -0.1210220 | 0.0001010  |
| C | -9.0582770  | -3.7130630 | -0.0005620 |
| C | -11.0879400 | -2.2205910 | -0.0004060 |
| O | -6.3751140  | -1.9581660 | -0.0001160 |
| C | -10.3333980 | 0.9559690  | 0.0004030  |
| C | -9.9288980  | 2.3239800  | 0.0008760  |
| N | -9.6166520  | 3.4471400  | 0.0012660  |
| C | -11.7467940 | 0.7546680  | 0.0002770  |
| N | -12.8989220 | 0.5802410  | 0.0001630  |
| H | -8.3898600  | -4.5622410 | -0.0006730 |
| H | -12.1049720 | -1.8582150 | -0.0004160 |
| S | -10.7821710 | -3.9310510 | -0.0006460 |
| H | -7.6883630  | 1.9249360  | 0.0003150  |
| H | 6.8325440   | 1.4518850  | -0.0000260 |

#### Designed Molecule H4

| Symbol | X         | Y         | Z         |
|--------|-----------|-----------|-----------|
| C      | 0.7006060 | 1.6794520 | 0.4794170 |
| C      | 0.6395520 | 0.3157820 | 0.0936650 |

|   |             |            |            |
|---|-------------|------------|------------|
| C | -0.6396270  | -0.3160130 | -0.0934380 |
| C | -1.8001230  | 0.4837820  | 0.1240560  |
| C | -1.7019320  | 1.8308940  | 0.5030390  |
| C | -0.4453870  | 2.4268810  | 0.6811280  |
| C | 1.8000470   | -0.4840120 | -0.1238270 |
| C | 1.7018580   | -1.8311200 | -0.5028180 |
| C | 0.4453140   | -2.4271110 | -0.6809010 |
| C | -0.7006810  | -1.6796840 | -0.4791830 |
| C | -3.2124440  | 0.1794410  | 0.0339510  |
| C | -3.9777310  | 1.3050860  | 0.3393320  |
| C | -3.0777690  | 2.4805030  | 0.6745420  |
| C | -5.6725470  | -0.2216530 | -0.1419600 |
| C | -5.3517940  | 1.0877180  | 0.2399970  |
| C | 3.2123730   | -0.1796680 | -0.0337350 |
| C | 3.9776560   | -1.3053130 | -0.3391180 |
| C | 3.0776930   | -2.4807290 | -0.6743300 |
| C | 5.6724710   | 0.2214550  | 0.1420900  |
| C | 5.3517280   | -1.0879380 | -0.2397940 |
| C | -6.9043330  | -0.9145130 | -0.2765120 |
| C | 6.9042320   | 0.9143790  | 0.2765030  |
| C | -8.2187930  | -0.4833810 | -0.2956500 |
| C | 8.2187430   | 0.4834050  | 0.2955140  |
| C | -9.3493240  | -1.3697930 | 0.0496960  |
| C | -10.4386140 | -0.4910180 | 0.5122140  |
| C | -10.0825720 | 0.8568750  | 0.2507860  |
| C | -8.7720830  | 0.8704660  | -0.4186260 |
| C | 9.3491780   | 1.3699930  | -0.0496760 |
| C | 10.4386450  | 0.4913830  | -0.5121110 |

|   |             |            |            |
|---|-------------|------------|------------|
| C | 10.0827100  | -0.8565910 | -0.2509930 |
| C | 8.7721730   | -0.8704180 | 0.4182810  |
| C | -11.6603030 | -0.7877250 | 1.1228880  |
| C | -12.5069270 | 0.2631130  | 1.4804660  |
| C | -12.1515610 | 1.5905790  | 1.2264690  |
| C | -10.9416220 | 1.9000020  | 0.6028290  |
| C | 11.6604150  | 0.7883060  | -1.1225110 |
| C | 12.5072090  | -0.2623940 | -1.4801100 |
| C | 12.1519510  | -1.5899430 | -1.2263760 |
| C | 10.9419220  | -1.8995820 | -0.6030090 |
| C | 9.4133340   | 2.7457780  | 0.0581390  |
| C | -9.4135810  | -2.7456010 | -0.0580930 |
| C | -10.5613220 | -3.5069020 | 0.3238770  |
| N | -11.4758870 | -4.1613570 | 0.6274010  |
| C | -8.3658540  | -3.5510850 | -0.6026810 |
| N | -7.5286070  | -4.2335600 | -1.0395360 |
| C | 8.3654420   | 3.5513510  | 0.6023390  |
| N | 7.5280970   | 4.2339750  | 1.0387670  |
| C | 10.5612500  | 3.5071150  | -0.3232910 |
| N | 11.4759680  | 4.1615540  | -0.6263800 |
| C | -3.2787090  | 3.6453550  | -0.3226450 |
| C | -3.2919610  | 2.9717750  | 2.1244470  |
| C | 3.2918880   | -2.9719980 | -2.1242330 |
| C | 3.2786290   | -3.6455900 | 0.3228510  |
| H | 1.6672630   | 2.1504400  | 0.6221790  |
| H | -0.3659360  | 3.4690410  | 0.9754680  |
| H | 0.3658640   | -3.4692730 | -0.9752330 |
| H | -1.6673370  | -2.1506770 | -0.6219290 |

|   |             |            |            |
|---|-------------|------------|------------|
| H | -6.1078060  | 1.8299730  | 0.4603220  |
| H | 6.1077320   | -1.8301850 | -0.4601460 |
| H | -6.7807530  | -1.9922310 | -0.2754710 |
| H | 6.7805780   | 1.9920880  | 0.2756050  |
| H | -11.9558630 | -1.8067270 | 1.3309970  |
| H | -10.6816270 | 2.9329990  | 0.4144900  |
| H | 11.9559230  | 1.8073770  | -1.3303860 |
| H | 10.6819530  | -2.9326230 | -0.4148360 |
| H | -4.2854780  | 4.0624930  | -0.2230530 |
| H | -3.1504190  | 3.3099020  | -1.3547770 |
| H | -2.5615050  | 4.4482410  | -0.1257580 |
| H | -4.3038040  | 3.3710720  | 2.2459480  |
| H | -2.5859490  | 3.7715490  | 2.3684120  |
| H | -3.1530760  | 2.1600170  | 2.8436060  |
| H | 4.3037280   | -3.3713030 | -2.2457290 |
| H | 3.1530110   | -2.1602390 | -2.8433920 |
| H | 2.5858710   | -3.7717670 | -2.3682020 |
| H | 4.2854080   | -4.0627110 | 0.2232860  |
| H | 2.5614450   | -4.4484860 | 0.1259300  |
| H | 3.1502880   | -3.3101550 | 1.3549820  |
| S | 4.1884280   | 1.1769680  | 0.3652020  |
| S | -4.1885030  | -1.1772050 | -0.3649360 |
| H | -12.8205610 | 2.3940990  | 1.5176420  |
| H | -13.4520130 | 0.0407880  | 1.9655560  |
| H | 13.4523450  | -0.0398950 | -1.9650230 |
| H | 12.8211060  | -2.3933300 | -1.5175530 |
| C | -8.2791070  | 1.8976760  | -1.2014070 |
| C | 8.2792340   | -1.8978060 | 1.2008210  |



|   |            |            |            |
|---|------------|------------|------------|
| C | -8.9031540 | 3.1815420  | -1.2796240 |
| N | -9.3752360 | 4.2442810  | -1.3482840 |
| C | -7.1659420 | 1.7495860  | -2.0823250 |
| N | -6.2732070 | 1.6689960  | -2.8259590 |
| C | 8.9032820  | -3.1817010 | 1.2785220  |
| N | 9.3755120  | -4.2444120 | 1.3466230  |
| C | 7.1662030  | -1.7498680 | 2.0819290  |
| N | 6.2735270  | -1.6694500 | 2.8256480  |
